# Supplementary material for: Enhanced luminescence of single-benzene fluorescent molecules through halogen bond cocrystals
Source: Royal Society of Chemistry journal article supplement (doi:10.1039/d2ce00229a), 2022-01-01
Supplement: d2ce00229a1.pdf [file d2ce00229a1.pdf]

## Supplementary Information

### Enhanced luminescence of single-benzene fluorescent molecules through halogen bond cocrystals

Fei Yu <sup>a</sup>, Xiunan Zhang <sup>a</sup>, Hongtu Zhao <sup>a</sup>, Zhicheng Jiang<sup>a,b</sup>, Ting Wang<sup>a,b\*</sup>, Na  
Wang<sup>a,b</sup>, Xin Huang<sup>a,b</sup>, Lina Zhou<sup>a,b</sup>, Hongxun Hao <sup>a,b,c\*</sup>

<sup>a</sup> National Engineering Research Center of Industrial Crystallization Technology, School of Chemical Engineering and Technology, Tianjin University, Tianjin 300072, China

<sup>b</sup> Collaborative Innovation Center of Chemical Science and Engineering (Tianjin), Tianjin, 300072, China

<sup>c</sup> School of Chemical Engineering and Technology, Hainan University, Haikou 570208, China

**Table S1.** Some currently reported examples of halogen-bonded co-crystals<sup>1-9</sup>

| No. | Acceptor | Donner | Halogen bonds                                                          |
|-----|----------|--------|------------------------------------------------------------------------|
| 1   |          |        | I...O (3.11 Å) I...S (3.23 Å)                                          |
| 2   |          |        | I...N (2.99 Å) I...S (3.17 Å)                                          |
| 3   |          |        | I...N (2.821 Å, 2.846 Å)<br>I...N (2.811)                              |
| 4   |          |        | I...N (2.932 Å, 2.902 Å, 2.934 Å, 2.927 Å)                             |
| 5   |          |        | I...N (2.95 Å, 2.81 Å)                                                 |
| 6   |          |        | I...N (3.000 Å, 2.84 Å)                                                |
| 7   |          |        | I...N (2.988 Å, 2.907 Å)<br>I...N (2.845 Å, 2.992 Å)                   |
| 8   |          |        | I...N (3.02 Å)<br>Br...N (3.00 Å)<br>Br...N (3.06 Å)                   |
| 9   |          |        | I...N (2.84 Å)<br>Br...N (2.96 Å)                                      |
| 10  |          |        | I...O (3.023 Å, 3.231 Å, 3.444 Å, 3.514 Å)<br>I...O (3.498 Å, 3.225 Å) |

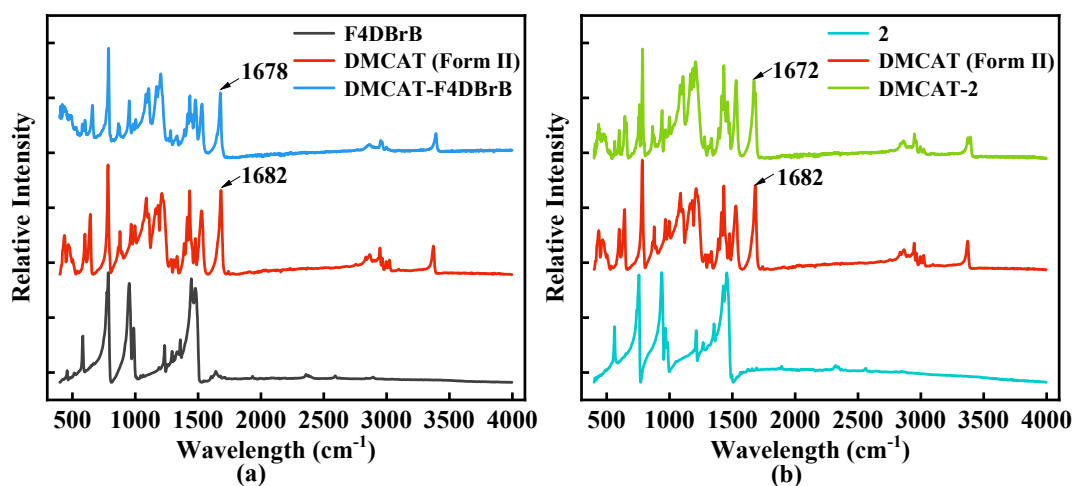

**Figure S1.** FT-IR spectra of (a) DMCAT-1 and (b) DMCAT-2, including corresponding co-formers and two polymorphs of DMCAT.

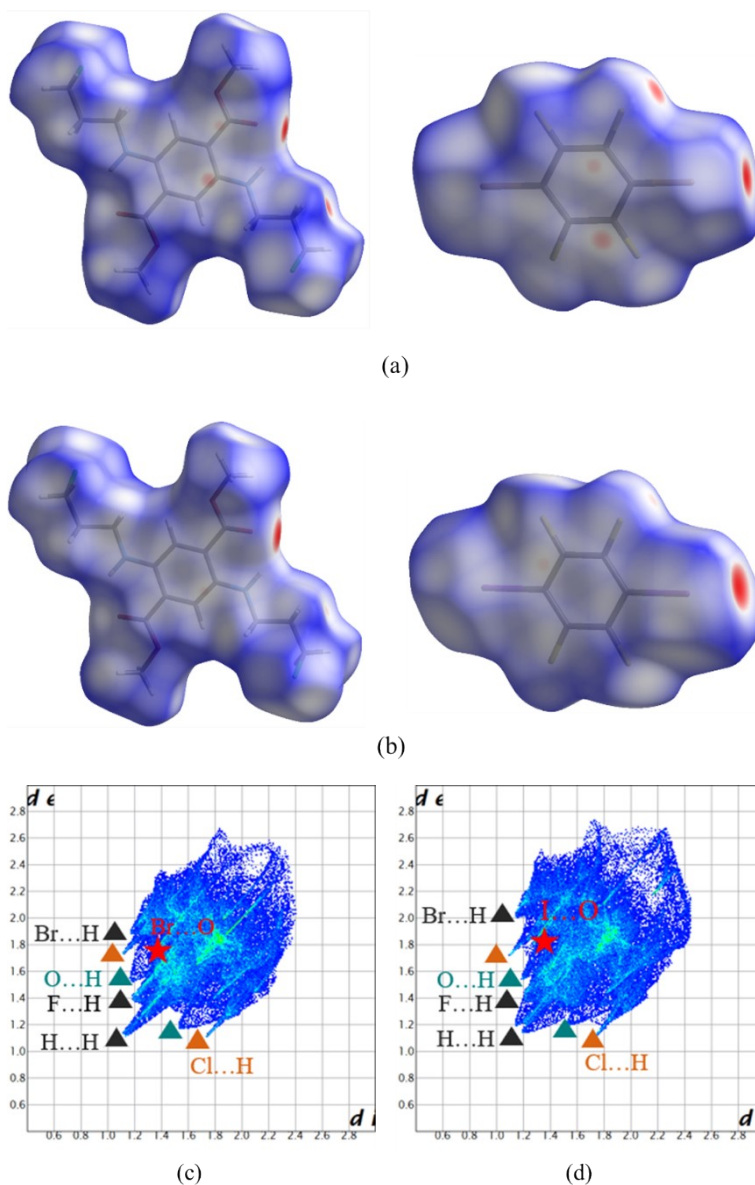

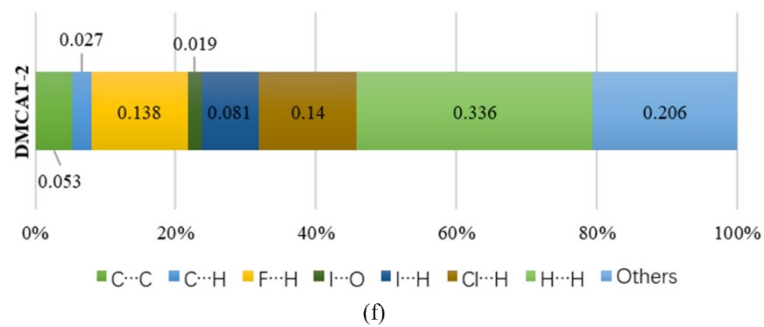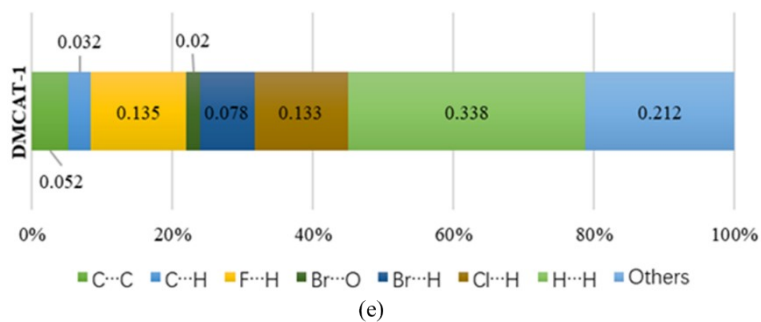

**Figure S2.** Hirshfeld surfaces for (a) DMCAT-1, (b) DMCAT-2; 2D fingerprint plots for (c) DMCAT-1, (d) DMCAT-2; Contributions to the Hirshfeld surface area in (e) DMCAT-1, (f) DMCAT-2.

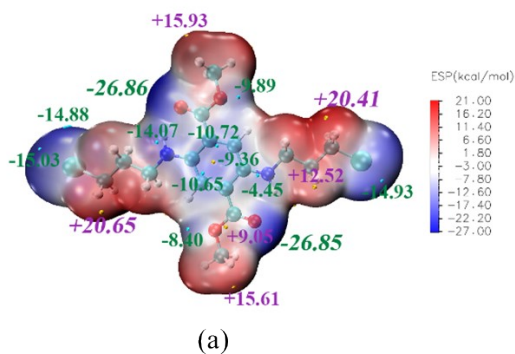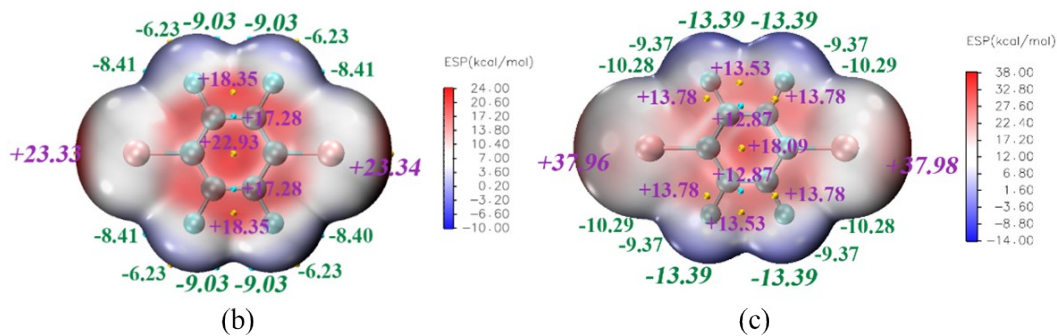

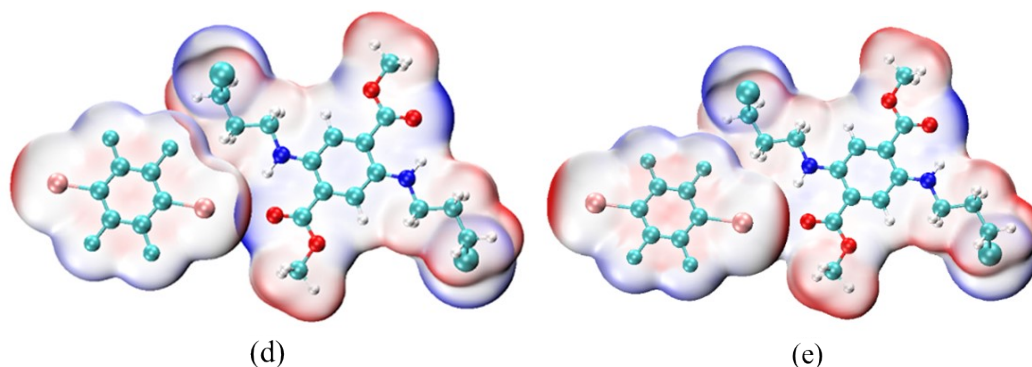

**Figure S3.** Molecular electrostatic potential maps of (a) DMCAT and (b) co-former 1 and (c) co-former 2. (The maxima and minima of the MEP points are indicated in purple and green italics, respectively.); Intermolecular van der Waals surface penetration map of (d) DMCAT-1 and (e) DMCAT-2.

## Reference

1. Cincic, D.; Friscic, T.; Jones, W. Isostructural materials achieved by using structurally equivalent donors and acceptors in halogen-bonded cocrystals. *Chemistry*. **2008**, 14, (2), 747-53, DOI: 10.1002/chem.200701184
2. Zhu, W.; Zheng, R.; Zhen, Y.; Yu, Z.; Dong, H.; Fu, H.; Shi, Q.; Hu, W. Rational Design of Charge-Transfer Interactions in Halogen-Bonded Co-crystals toward Versatile Solid-State Optoelectronics. *J Am Chem Soc*. **2015**, 137, (34), 11038-46, DOI: 10.1021/jacs.5b05586
3. Zhang, P.; Bolla, G.; Qiu, G.; Shu, Z.; Yan, Q.; Li, Q.; Ding, S.; Ni, Z.; Zhu, W.; Dong, H.; Zhen, Y.; Hu, W. Halogen bonded cocrystal polymorphs of 1,4-di(4'-pyridyl)-1,3-diacetylene. *CrystEngComm*. **2017**, 19, (31), 4505-4509, DOI: 10.1039/c7ce00892a
4. Du, S.; Ma, S.; Xu, B.; Tian, W. Optical Waveguide and Photoluminescent Polarization in Organic Cocrystal Polymorphs. *J Phys Chem Lett*. **2021**, 12, (38), 9233-9238, DOI: 10.1021/acs.jpcclett.1c02726
5. Liu, Y.; Ma, S.; Xu, B.; Tian, W. Construction and function of a highly efficient supramolecular luminescent system. *Faraday Discuss*. **2017**, 196, 219-229, DOI: 10.1039/c6fd00166a
6. Perera, M. D.; Desper, J.; Sinha, A. S.; Aakeröy, C. B. Impact and importance of electrostatic potential calculations for predicting structural patterns of hydrogen and halogen bonding. *CrystEngComm*. **2016**, 18, (44), 8631-8636, DOI: 10.1039/C6CE02089E
7. Yan, D.; Delori, A.; Lloyd, G. O.; Friscic, T.; Day, G. M.; Jones, W.; Lu, J.; Wei, M.; Evans, D. G.; Duan, X. A cocrystal strategy to tune the luminescent properties of stilbene-type organic solid-state materials. *Angew Chem Int Ed Engl*. **2011**, 50, (52), 12483-6, DOI: 10.1002/anie.201106391
8. Bolla, G.; Liao, Q.; Amirjalayer, S.; Tu, Z.; Lv, S.; Liu, J.; Zhang, S.; Zhen, Y.; Yi, Y.; Liu, X.; Fu, H.; Fuchs, H.; Dong, H.; Wang, Z.; Hu, W. Cocrystallization Tailoring Multiple Radiative Decay Pathways for Amplified Spontaneous Emission. *Angew Chem Int Ed Engl*. **2021**, 60, (1), 281-289, DOI: 10.1002/anie.202007655
9. Zbačnik, M.; Pajski, M.; Stilinović, V.; Vitković, M.; Cinčić, D. The halogen bonding proclivity of the ortho-methoxy-hydroxy group in cocrystals of o-vanillin imines and diiodotetrafluoro-benzenes. *CrystEngComm*. **2017**, 19, (37), 5576-5582, DOI: 10.1039/c7ce01332a
